# Supplementary material
Source: PubMed Central journal article supplement (PMC7406291)
Supplement: jciinsight-5-138345-s007.pdf [file jciinsight-5-138345-s007.pdf]

# Supplementary Figure 1

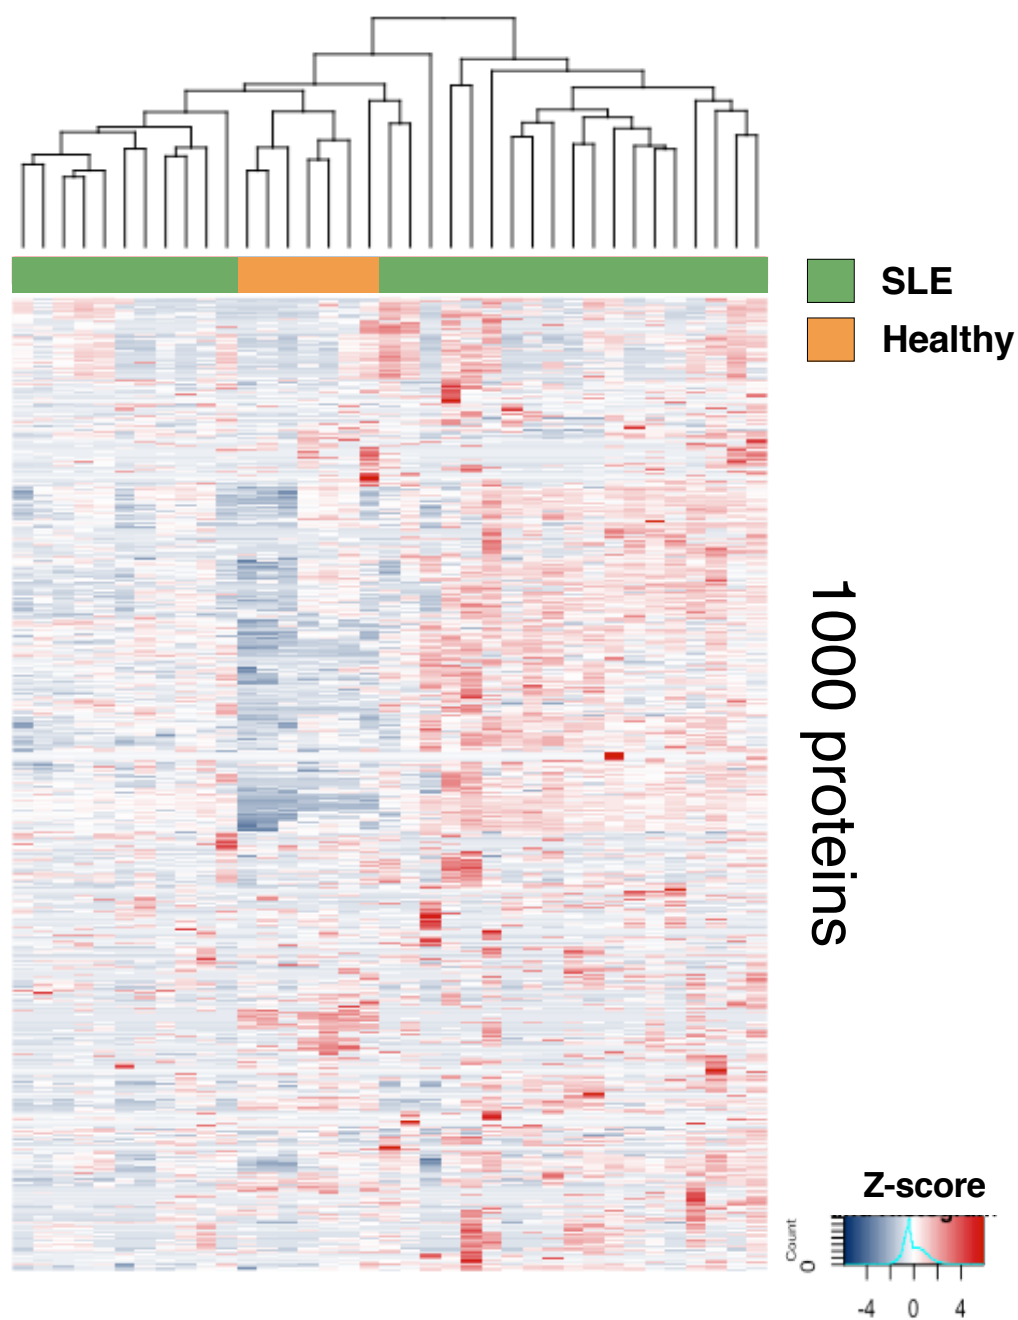

**Supplementary Figure 1. Overview of the urine biomarkers.** Heatmap showing the relative concentration of the 1000 measure analytes (scaled by subject and analyte). Hierarchical clustering based on Ward's rule and Euclidean distance.

# Supplementary Figure 2

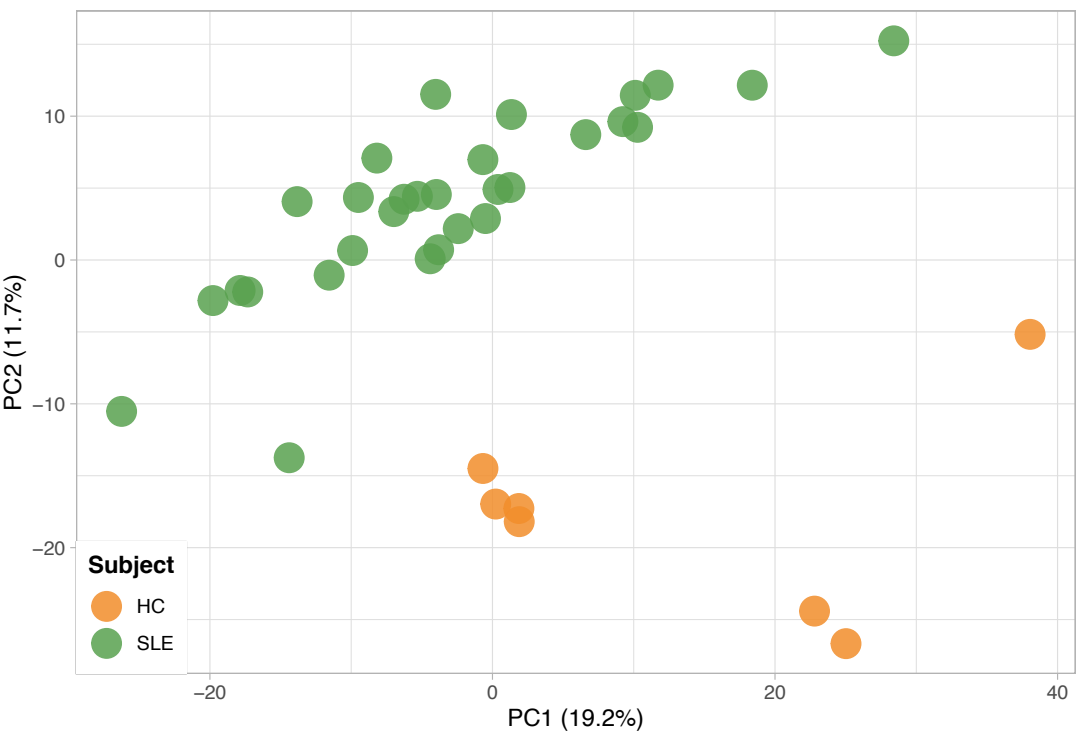

**Supplementary Figure 2. Principal component analysis of all urine analytes separates healthy subjects from lupus nephritis.** PCA plot (n=37) of the first 2 principal components with % variance explained. Principal components are calculated independently in each analysis: PC1 in this figure does not correspond to PC in Figure 1.

## Supplementary Figure 3

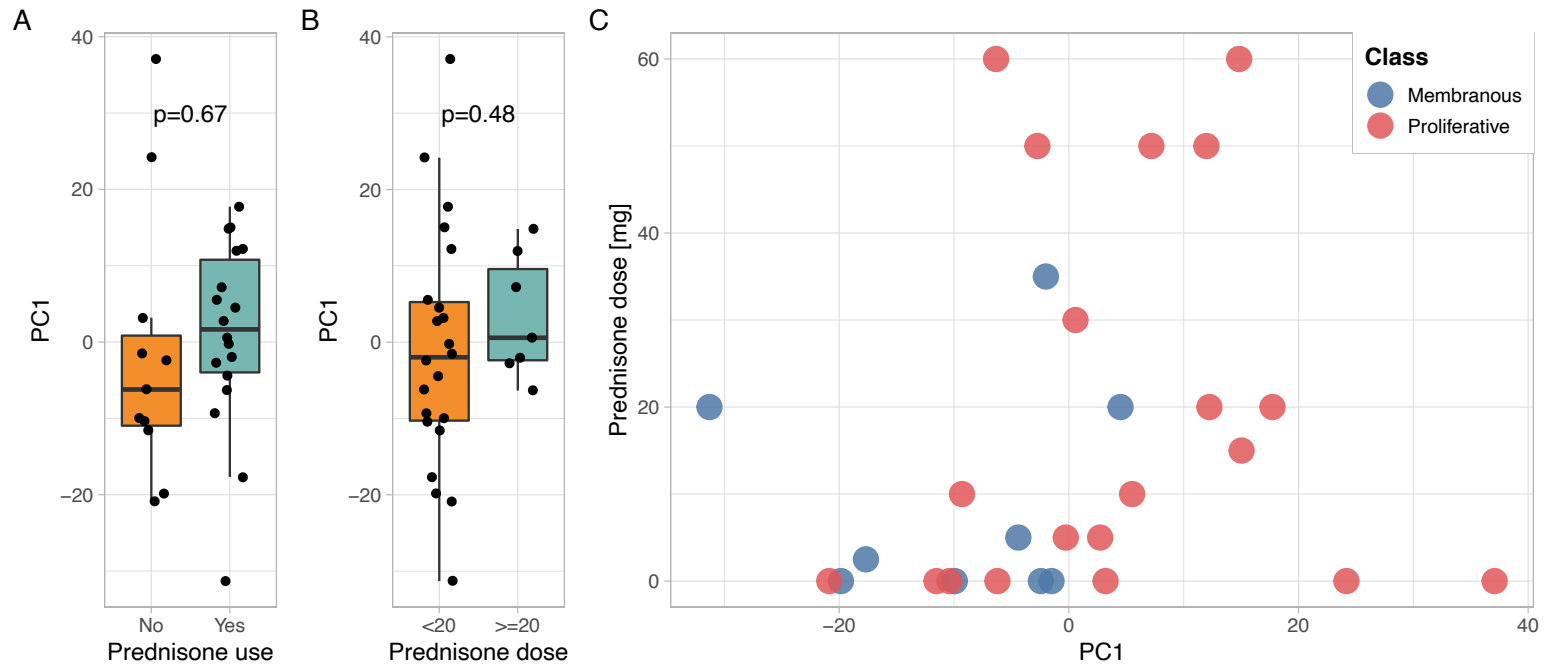

**Supplementary Figure 3. Treatment with prednisone is not associated with urinary PC1.** Box plots illustrating PC1 values (n=30) based on any prednisone use (A) or by dose greater or lower than 20mg daily (B). No significant difference was detected (t test). The scatter plot (C) shows the absence of association between PC1 values and prednisone daily doses analyzed as a continuous variable (Pearson  $r=0.18$ ,  $p=0.34$ ).

## Supplementary Figure 4

A

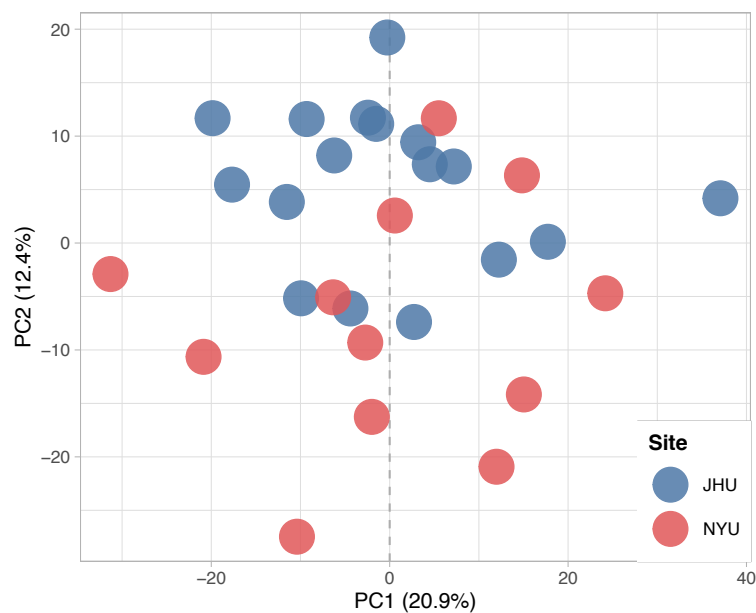

B

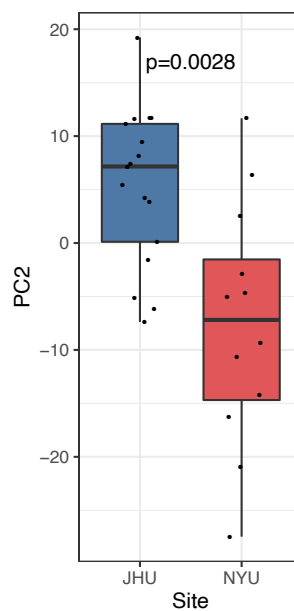

**Supplementary Figure 4. Principal component 2 detects collection site.** (A-B) PCA (n=30) of the first 2 principal components of the urine proteome (% variance explained is indicated). PC2, but not PC1, was associated with the urine collection site. There was no biological pathway significantly enriched in PC2.

## Supplementary Figure 5

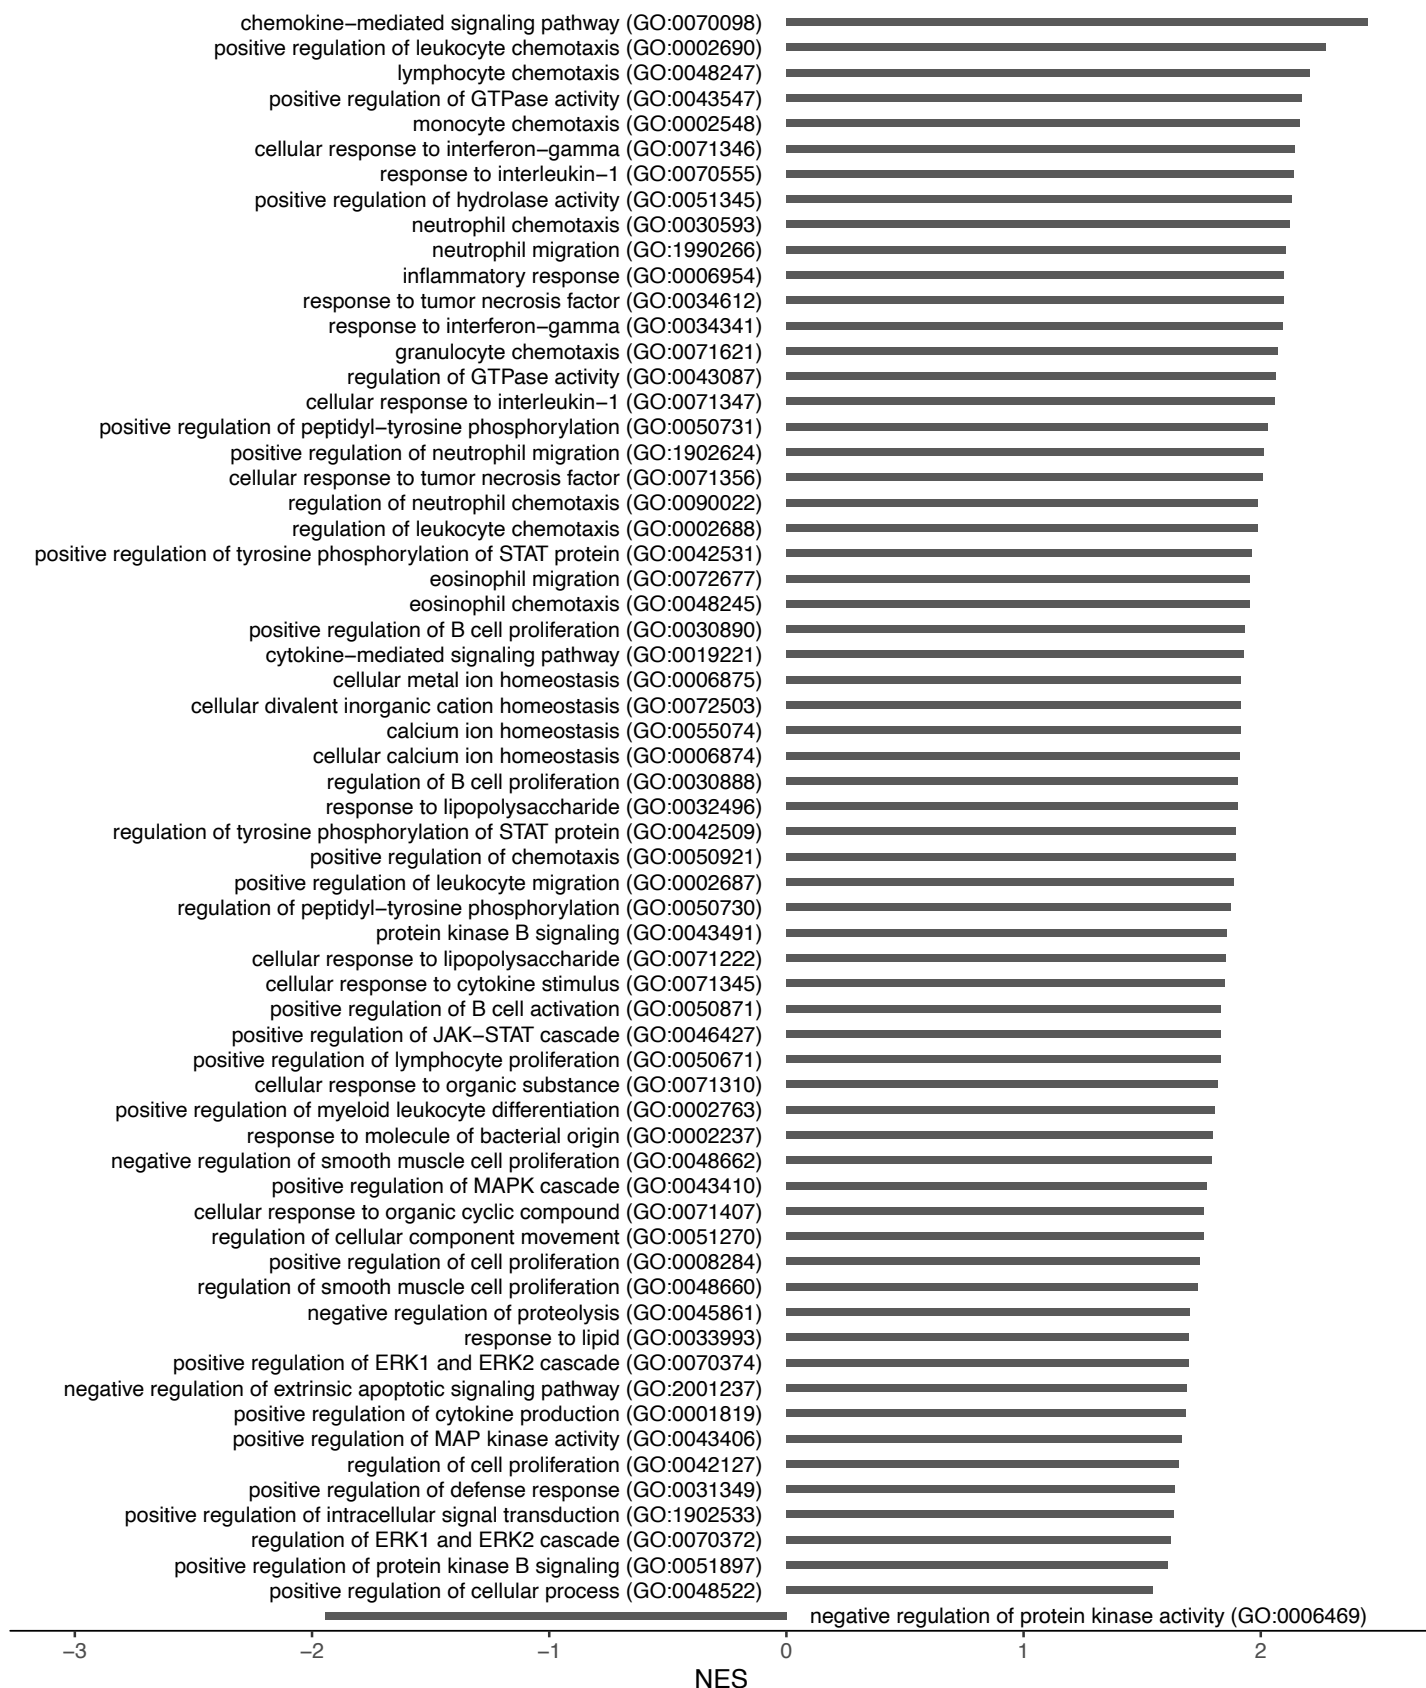

**Supplementary Figure 5. Complete list of pathways enriched in the urine proteome PC1.** 2018 Gene Ontology Biological Process pathways with a FDR <5% are ordered by their normalized enrichment score.

# Supplementary Figure 6

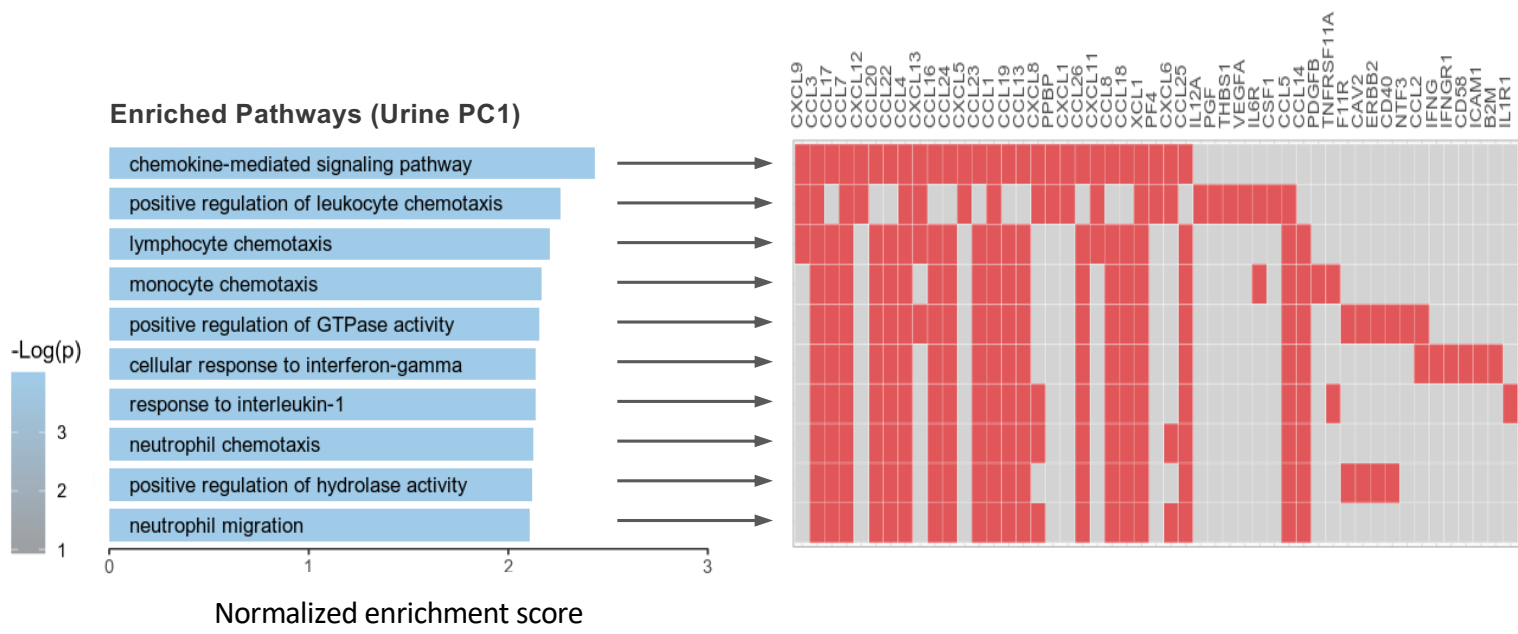

**Supplementary Figure 6. Definition of a chemokine score.** First, the genes coding for the proteins defining the leading edge of “Chemokine-mediated signaling pathway GO:0070098”, the most enriched pathway in urine PC1 were identified. Then, a score for each cell was defined based on the sum of the normalized expression at the single cell level in the kidney. The same operation was repeated for “Cellular response to interferon-gamma (GO:0071346)”.

# Supplementary Figure 7

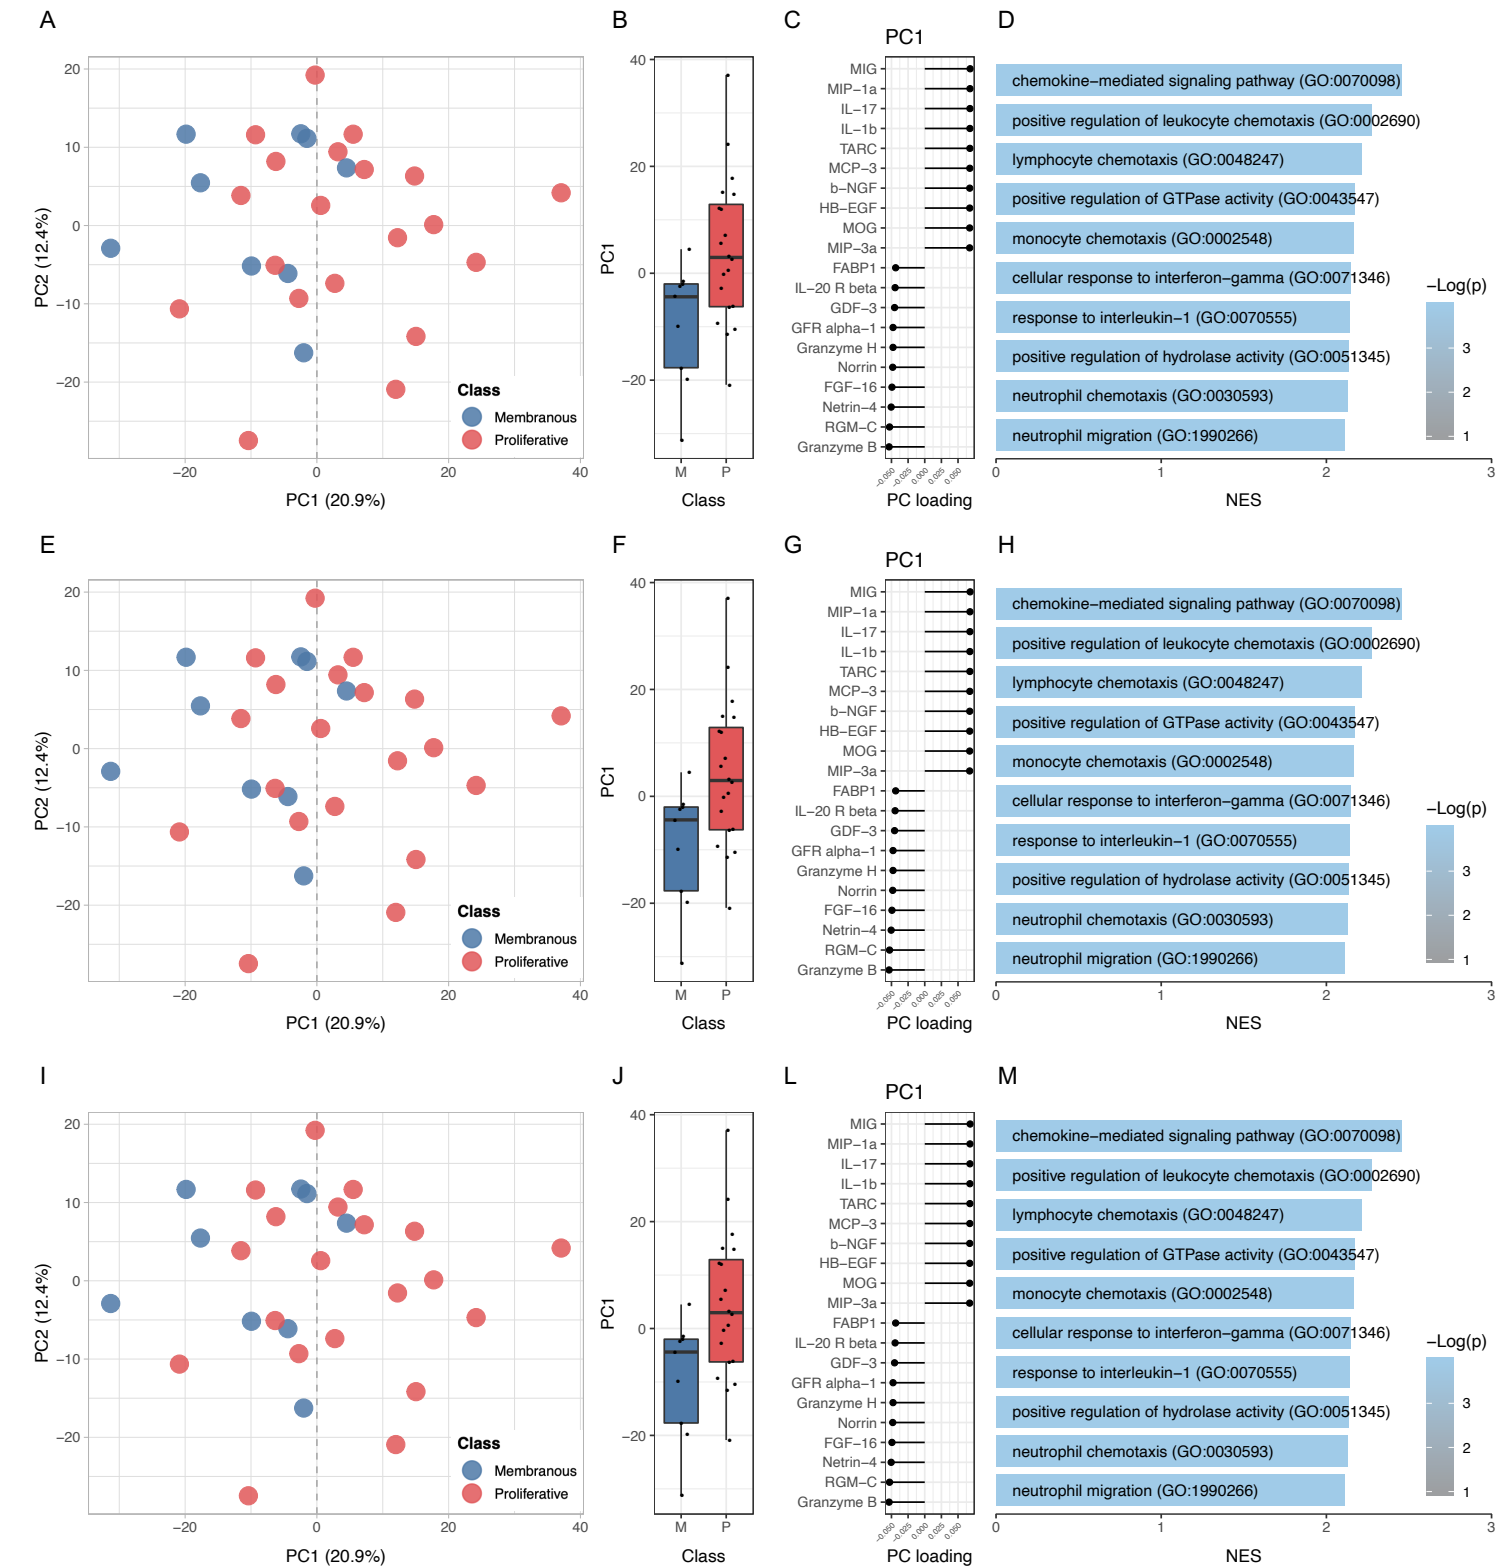

**Supplementary Figure 7.** Adjustment for glomerular (albumin) or tubular (B2M) dysfunction. Urine analyte concentrations were normalized for the concentration of albumin (A-D), beta-2 microglobulin (E-H), or both (I-M) in order to account for non-specific protein excretion through the glomerulus, tubule, or both, respectively. Panels A,B, E, F, I, and J show the PCA (n=30) of the first 2 principal components of the urine proteome (% variance explained is indicated). Panels C, G, and L showed the top and bottom 10 PC1 loading values of the measured urine protein. Panels D, H, and M the top 10 enriched pathways PC1 using Gene Ontology Biological Process indicating the biological significance of PC1.

# Supplementary Figure 8

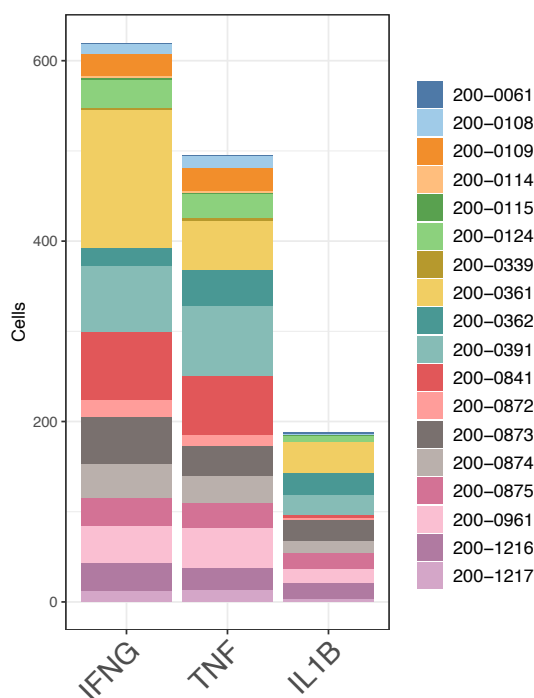

**Supplementary Figure 8. Distribution of cytokine positive cells among patients.** Cells with positive cytokine unique molecular identifiers (UMIs) were quantified in the renal biopsy single cell transcriptomics. The bar plot summarizes the individual contribution from samples with at least 10 high quality cells. As detailed in table S1, cytokine positive cells were found in all patients.

# Supplementary Figure 9

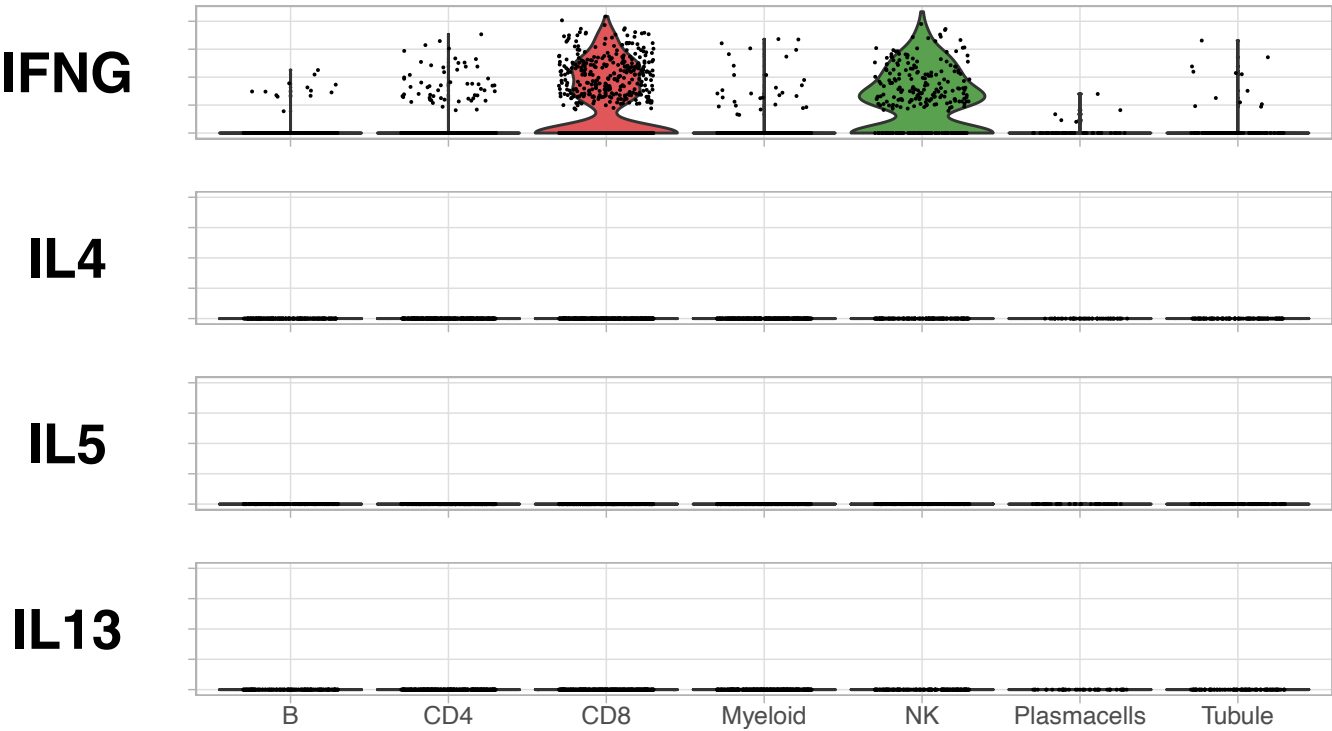

**Supplementary Figure 9. No expression of type 2 (Th2) immunity cytokines was detected in lupus nephritis kidney.** Violin plots showing that there was abundant expression of the type 1 (Th1) immunity cytokine IFNG but none of the type 2 (Th2) immunity cytokines (IL4, IL5, and IL13) were detected in lupus nephritis kidney by single cell RNA sequencing .

**The complete list of authors (including consortium members) is as follows:**

Andrea Fava<sup>1\*</sup>, Jill Buyon<sup>2</sup>, Chandra Mohan<sup>3</sup>, Ting Zhang<sup>3</sup>, H. Michael Belmont<sup>2</sup>, Peter Izmirly<sup>2</sup>, Robert Clancy<sup>2</sup>, Jose Monroy Trujillo<sup>4</sup>, Derek Fine<sup>4</sup>, Yuji Zhang<sup>5,6</sup>, Laurence Magder<sup>5</sup>, Deepak A. Rao<sup>7</sup>, Arnon Arazi<sup>8</sup>, Celine C. Berthier<sup>9</sup>, Anne Davidson<sup>10</sup>, Betty Diamond<sup>10</sup>, Nir Hacohen<sup>8</sup>, David Wofsy<sup>11</sup>, William Apruzzese<sup>7</sup>, Yanyan Liu<sup>8</sup>, Paul J. Hoover<sup>8</sup>, Adam Chicoine<sup>18</sup>, Thomas M. Eisenhaure<sup>8</sup>, A. Helena Jonsson<sup>7</sup>, Shuqiang Li<sup>8</sup>, David J. Lieb<sup>8</sup>, Fan Zhang<sup>7</sup>, Kamil Slowikowski<sup>7</sup>, Edward P. Browne<sup>19</sup>, Akiko Noma<sup>8</sup>, Danielle Sutherby<sup>20</sup>, Scott Steelman<sup>21</sup>, Dawn E. Smilek<sup>18,22</sup>, Patti Tosta<sup>18,22</sup>, Elena Massarotti<sup>7</sup>, Maria Dall'Era<sup>11</sup>, Meyeon Park<sup>23</sup>, Diane L. Kamen<sup>24</sup>, Richard A. Furie<sup>25</sup>, Fernanda Payan-Schober<sup>26</sup>, William F. Pendergraft III<sup>27</sup>, Elizabeth A. McInnis<sup>28</sup>, Chaim Putterman<sup>30</sup>, Kenneth C. Kalunian<sup>31</sup>, E. Steve Woodle<sup>31</sup>, James A. Lederer<sup>32</sup>, David A. Hildeman<sup>33,34</sup>, Chad Nusbaum<sup>7</sup>, Matthias Kretzler<sup>3</sup>, Jennifer H. Anolik<sup>35</sup>, Michael B. Brenner<sup>7</sup>, Dia Waguespack<sup>27</sup>, Sean M. Connery<sup>26</sup>, Maureen A. McMahon<sup>29</sup>, William J. McCune<sup>3</sup>, Ruba B. Kado<sup>3</sup>, Raymond Hsu<sup>23</sup>, Melissa A. Cunningham<sup>12</sup>, Paul J. Utz<sup>36</sup>, Mina Pichavant<sup>36</sup>, Holden T. Maecker<sup>37</sup>, Rohit gupta<sup>38</sup>, Judith A. James<sup>39</sup>, Joel M. Guthridge<sup>39</sup>, Chamith Fonseka<sup>7</sup>, Joseph Mears<sup>7</sup>, Evan Der<sup>30</sup>, Thomas Tuschl<sup>40</sup>, Hemant Suryawanshi<sup>40</sup>, Daniel Goldman<sup>1</sup>, Soumya Raychaudhuri<sup>13-17</sup>, and Michelle Petri<sup>1</sup>

1. Division of Rheumatology, Johns Hopkins University School of Medicine, Baltimore, MD, USA.
2. New York University School of Medicine, New York, New York, USA.
3. University of Houston, Houston, USA.
4. Division of Nephrology, Johns Hopkins University, Baltimore, MD, USA.
5. Department of Epidemiology and Public Health, University of Maryland, Baltimore, MD, USA.
6. University of Maryland Marlene and Stewart Greenebaum Comprehensive Cancer Center, Baltimore, Maryland.
7. Division of Rheumatology, Inflammation and Immunity, Department of Medicine, Brigham and Women's Hospital, Harvard Medical School, Boston, MA, USA
8. Broad Institute of MIT and Harvard, Cambridge, MA, USA.
9. Internal Medicine, Department of Nephrology, University of Michigan, Ann Arbor, MI, USA.
10. Center for Autoimmune and Musculoskeletal Diseases, The Feinstein Institute for Medical Research, Northwell Health, Manhasset, NY, USA.
11. Rheumatology Division, University of California San Francisco, San Francisco, CA, USA.
12. Multiple Organizations.
13. Center for Data Sciences, Brigham and Women's Hospital, Boston, MA 02115, USA.
14. Division of Rheumatology and Genetics, Department of Medicine, Brigham and Women's Hospital, Boston, MA 02115, USA.
15. Department of Biomedical Informatics, Harvard Medical School, Boston, MA 02115 USA.
16. Program in Medical and Population Genetics, Broad Institute of MIT and Harvard, Cambridge, MA, USA.

17. Centre for Genetics and Genomics Versus Arthritis, Centre for Musculoskeletal Research, Manchester Academic Health Science Centre, The University of Manchester, Oxford Road, Manchester, UK.
18. Lupus Nephritis Trials Network, University of California San Francisco, San Francisco, CA, USA.
19. UNC HIV Cure Center and Department of Medicine, University of North Carolina at Chapel Hill, Chapel Hill, NC, USA.
20. Celsius Therapeutics, Cambridge, MA, USA.
21. Cellarity, Inc., Cambridge, MA, USA.
22. Immune Tolerance Network, University of California San Francisco, San Francisco, CA, USA.
23. Division of Nephrology, University of California San Francisco, San Francisco, CA, USA.
24. Division of Rheumatology and Immunology, Medical University of South Carolina, Charleston, SC, USA.
25. Division of Rheumatology, Northwell Health, Great Neck, NY, USA.
26. Department of Medicine, Paul L. Foster School of Medicine, Texas Tech University Health Sciences Center, El Paso, TX, USA.
27. The Integrative Medical Clinic of North Carolina, PLLC, Chapel Hill, NC, USA.
28. University of North Carolina Kidney Center, Division of Nephrology and Hypertension, Department of Medicine, UNC School of Medicine, Chapel Hill, NC, USA.
29. Department of Medicine, Division of Rheumatology, New York University School of Medicine, New York, NY, USA.
30. Division of Rheumatology and Department of Microbiology and Immunology, Albert Einstein College of Medicine and Montefiore Medical Center, Bronx, NY, USA.
31. University of California San Diego School of Medicine, La Jolla, CA, USA.
32. Division of Transplantation, Department of Surgery, University of Cincinnati College of Medicine, Cincinnati, OH, USA.
33. Department of Surgery, Brigham and Women's Hospital, Harvard Medical School, Boston, MA, USA.
34. Department of Pediatrics, University of Cincinnati, Cincinnati, OH, USA.
35. Division of Immunobiology, Cincinnati Children's Hospital Medical Center, Cincinnati, Ohio, USA.
36. Department of Medicine, Division of Allergy, Immunology, and Rheumatology, University of Rochester Medical Center, Rochester, NY, USA.
37. Department of Medicine, Division of Immunology and Rheumatology, Stanford University School of Medicine, Stanford, CA, USA.
38. Department of Microbiology & Immunology, Stanford University School of Medicine, Stanford, CA, USA.
39. Institute for Immunity, Transplantation, and Infection, Stanford University School of Medicine, Stanford, CA, USA.
40. Arthritis and Clinical Immunology, Oklahoma Medical Research Foundation, Oklahoma City, OK, USA.
41. Laboratory of RNA Molecular Biology, Rockefeller University, New York, NY, USA.
